# Supplementary material for: Pharmaceutical Potential of High-Altitude Plants for Fatigue-Related Disorders: A Review
Source: MDPI journal article supplement (doi:10.3390/plants11152004), 2022-07-31
Supplement: s1 [file s1]

## Supplementary Materials

**Table S1.** The main active ingredients and anti-fatigue mechanism of high-altitude plants.

| No. | Latin Name                                                                      | Main Active Ingredients                                                    | Traditional Use                                                                               | Mechanism of Anti-Fatigue Activity                                        |
|-----|---------------------------------------------------------------------------------|----------------------------------------------------------------------------|-----------------------------------------------------------------------------------------------|---------------------------------------------------------------------------|
| 1   | <i>Rhodiola rosea</i> L.                                                        | Salidroside [9]                                                            | Alleviate fatigue, depression, and cognitive dysfunction [67]                                 | Neuroprotection [67,68], scavenging free radicals, antioxidation [69]     |
| 2   | <i>Brassica rapa</i> L.                                                         | Polysaccharides [70]                                                       | Tonic and anti-hypoxia, heat-clearing and detoxification, alleviating fatigue [50]            | Removal of accumulated metabolites [71], antioxidation [55]               |
| 3   | <i>Crocus sativus</i> L.                                                        | Cordycepin [12]                                                            | Neurodegeneration or metabolic diseases [72]                                                  | Anti-inflammatory and antioxidation [10]                                  |
| 4   | <i>Lepidium meyenii</i> W.                                                      | Polysaccharides [4], macaenes, macamides [10]                              | Increase fertility [73]                                                                       | Removal of accumulated metabolites, improvement of energy metabolism [74] |
| 5   | <i>Hippophaerhamnoides</i> L.                                                   | Polysaccharides [5], flavonol glycosides [75]                              | Alleviate fatigue caused by oxygen deficiency [5]                                             | Antioxidation [76]                                                        |
| 6   | <i>Saussurea involucrata</i> Sch.-Bip.                                          | Acacetin, hispidulin, and rutin [77,45]                                    | Alleviate pain and inflammatory [78]                                                          | Scavenge free radicals [79], antioxidation [80]                           |
| 7   | <i>Cordyceps sinensis</i> Sacc.                                                 | Polysaccharides [81], crocin [13], Flavones, neo-Clerodane diterpenes [83] | Prevention of anemia, physical weakness                                                       | Increase storage of energy, antioxidation [82]                            |
| 8   | <i>Ajuga ciliata</i> Bunge                                                      | Shikonin, polysaccharide                                                   | Swelling, rheumatic pain, and traumatic injury                                                | Anti-inflammatory [84]                                                    |
| 9   | <i>Arnebia euchroma</i> Johnst.                                                 | Lignan                                                                     | Antitumor, immunomodulatory [85]                                                              | Scavenge free radicals [86], antioxidation [87]                           |
| 10  | <i>Anthriscus sylvestris</i> Hoffm. Gen                                         | Saponins, polysaccharides and lectins [89]                                 | Antitumor, anti-inflammatory [88]                                                             | Anti-inflammatory [88]                                                    |
| 11  | <i>Polygonatum kingianum</i>                                                    | Triterpenoids                                                              | Diabetes, fatigue, feebleness, indigestion [89].                                              | Promote energy metabolism and antioxidation ability [90]                  |
| 12  | <i>Cimicifuga foetida</i> L.                                                    | Triterpenoids [92]                                                         | Perimenopausal symptoms [91]                                                                  | Neuroprotection [91]                                                      |
| 13  | <i>Stachyurus himalaicus</i> var. <i>himalaicus</i> Hook. f. et Thoms. ex Benth | Flavonoid glycosides [94], anthocyanins [95]                               | Galactopoietic, diuretic, dropsy and gonorrhea [93]                                           | Antioxidation and anti-inflammatory                                       |
| 14  | <i>Camellia reticulata</i> Lindl.                                               | Saponins                                                                   | Heat-clearing, damp-draining, blood-cooling, and detoxifying                                  | Scavenge free radicals [96]                                               |
| 15  | <i>Pedicularis longiflora</i> var. <i>tubiformis</i>                            |                                                                            | Leucorrhoea, fevers, sterility, rheumatism, general debility, collapse, urinary problems [97] | Antioxidation [98]                                                        |

**References follow the main text**
